# Supplementary material
Source: PubMed Central journal article supplement (PMC3799944)

# **Supporting Information**

## **Synthesis of Sequence-Specific DNA-Protein Conjugates via a Reductive Amination Strategy**

By Susith Wickramaratne, Shivam Mukherjee, Peter Villalta, Orlando Schärer,  
and Natalia Tretyakova

**Table S1.** Sites of reductive amination-mediated cross-linking between DHP-deaza-dG containing DNA and recombinant histone H4 protein as identified by nano HPLC-ESI<sup>+</sup>-MS/MS of tryptic digests.

| <b>Amino acid positions</b> | <b>Amino acid sequence</b> | <b>Site of modification</b> |
|-----------------------------|----------------------------|-----------------------------|
| 1 - 6                       | MSG <u>R</u> GK            | R4                          |
| 1 - 9                       | MSG <u>R</u> GKGGK         | R4                          |
| 10 - 17                     | GLG <u>K</u> GGAK          | K13                         |
| 10 - 18                     | GLG <u>K</u> GGAKR         | K13                         |
| 21 - 24                     | KV <u>L</u> R              | R24                         |
| 21 - 24                     | <u>K</u> VLR               | K21                         |
| 46 - 56                     | <u>R</u> ISGLIYEETR        | R46                         |

**Table S2.** Sites of reductive amination-mediated crosslinking between DHP-deaza-dG containing DNA and myoglobin as identified by nano HPLC-ESI<sup>+</sup>-MS/MS of tryptic digests.

| <b>Amino acid positions</b> | <b>Amino acid sequence</b> | <b>Site of modification</b> |
|-----------------------------|----------------------------|-----------------------------|
| 46 - 56                     | FKHL <u>K</u> TEAEMK       | K50                         |
| 134 - 145                   | ALELF <u>R</u> NDIAAK      | R139                        |
| 134 - 145                   | ALELFRNDIAA <u>K</u>       | K145                        |
| 140 - 145                   | NDIAA <u>K</u>             | K145                        |
| 140 - 147                   | NDIAA <u>K</u> YK          | K145                        |

**Table S3.** Sites of reductive amination-mediated crosslinking between DHP-deaza-dG containing DNA and RNase I as identified by nano HPLC-ESI<sup>+</sup>-MS/MS sequencing of tryptic peptides.

| <b>Amino acid positions</b> | <b>Amino acid sequence</b>             | <b>Site of modification</b> |
|-----------------------------|----------------------------------------|-----------------------------|
| 1 - 7                       | <u><b>K</b></u> ETAAAK                 | K1                          |
| 40 - 61                     | C <u><b>K</b></u> PVNTFVHESLADVQAVCSQK | K41                         |
| 40 - 61                     | CKPVNTFVHESLADVQAVCSQ <u><b>K</b></u>  | K61                         |

**Figure S1.** Influence of reaction temperature on DPC yields from reductive amination-mediated crosslinking between DHP-deaza-dG containing DNA and the AlkB protein (A) Lane 1-3 and (B): Oxidative cleavage was most efficient at 4 °C; (A) Lane 5-7 and (C): Cross-linking reaction gave the highest yields at 37 °C.

(A)

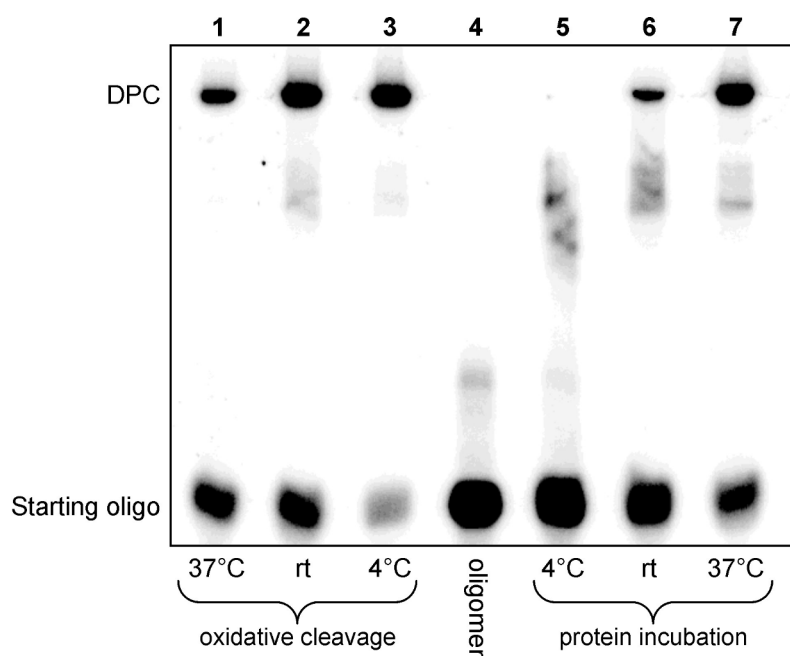

(B) Oxidative cleavage

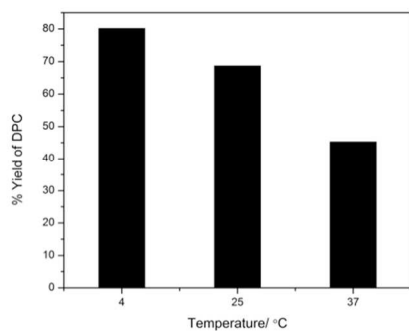

(C) Reductive amination

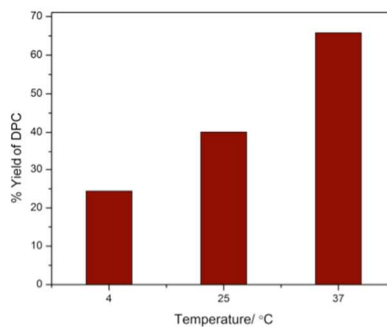

**Figure S2.** Influence of reaction time on DPC yields from reductive amination-mediated crosslinking between DHP-deaza-dG containing DNA and the AlkB protein. (A) Lane 1-4 and (B): Oxidative cleavage was high yielding at shorter reaction times (2-6 h); (A) Lane 6-9 and (C): Cross-linking reaction gave highest yields of DPCs when incubated for longer reaction times (12-24 h); Lane 10: Proteinase K digested reaction mixture did not show low mobility DPC band.

**A.**

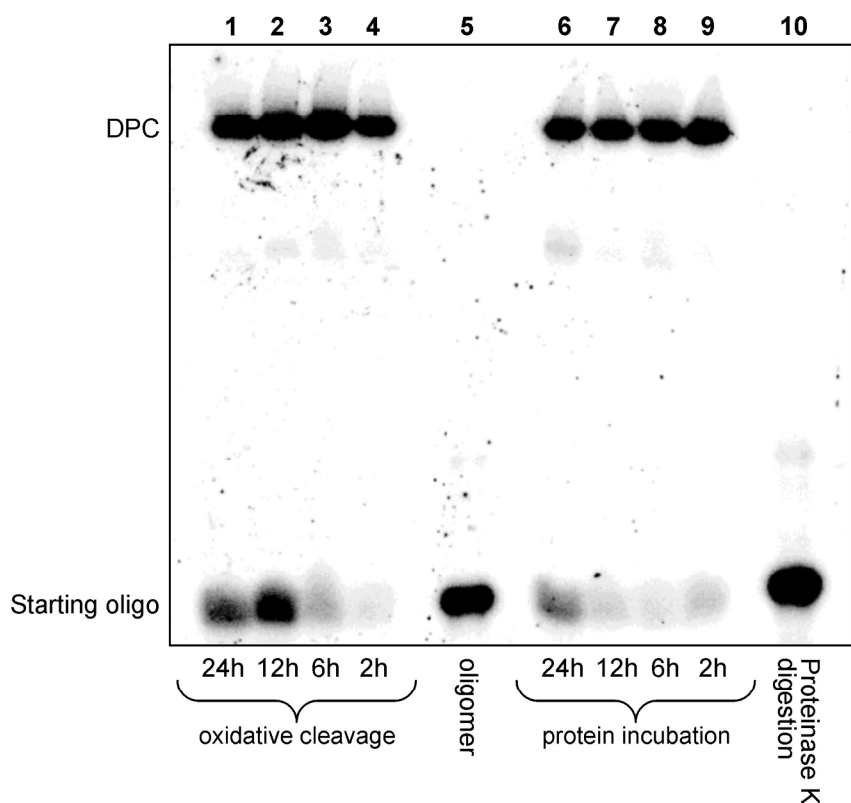

**B. oxidative cleavage time**

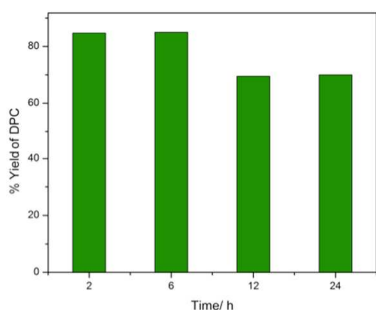

**C. reductive amination time**

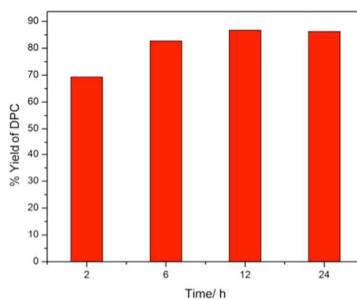

**Figure S3.** SDS-PAGE analysis of DPCs prepared using a set of different peptides that were visualized via  $^{32}\text{P}$ -end labeling of DNA. *Lane 1:* Aldehyde containing oligonucleotide in the presence of the reducing agent (negative control), *Lane 2:* Substance P produces DNA-peptide conjugate in very high yeilds, *Lane 3:* A single DPC band for Hypertensin I, which has only one arginine residue, but no lysine residues, proved that arginine is also involved in crosslinking to DNA; *Lane 4:* Multiple DPC bands observed with Tat peptide, which is highly rich in lysine and arginine residues suggesting the possibility of multiple DNA molecules binding to the same peptide/protein; *Lane 5:* No DPC bands are observed for pepstatin, which has no lysine or arginine residues suggesting that lysines and arginines are involved in cross-linking to DNA.

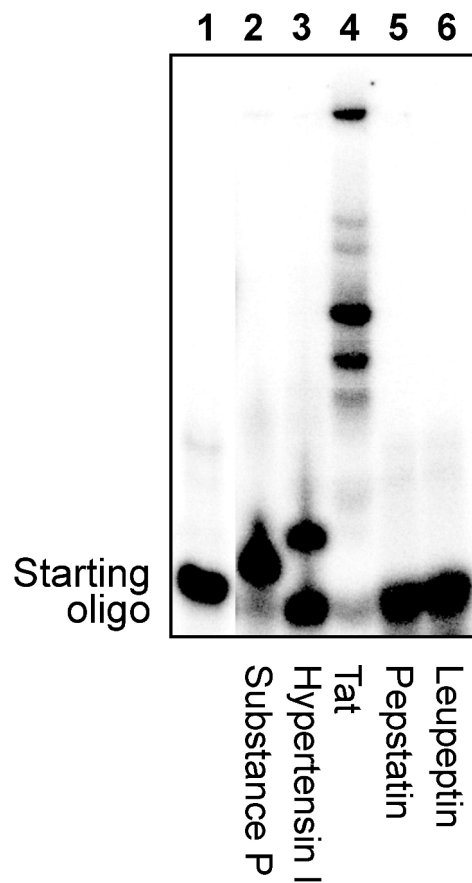

**Figure S4.** Amino acids side chains of myoglobin (A) and ribonuclease A (B) participating in reductive amination-mediated cross-linking to aldehyde-containing DNA.

(A)

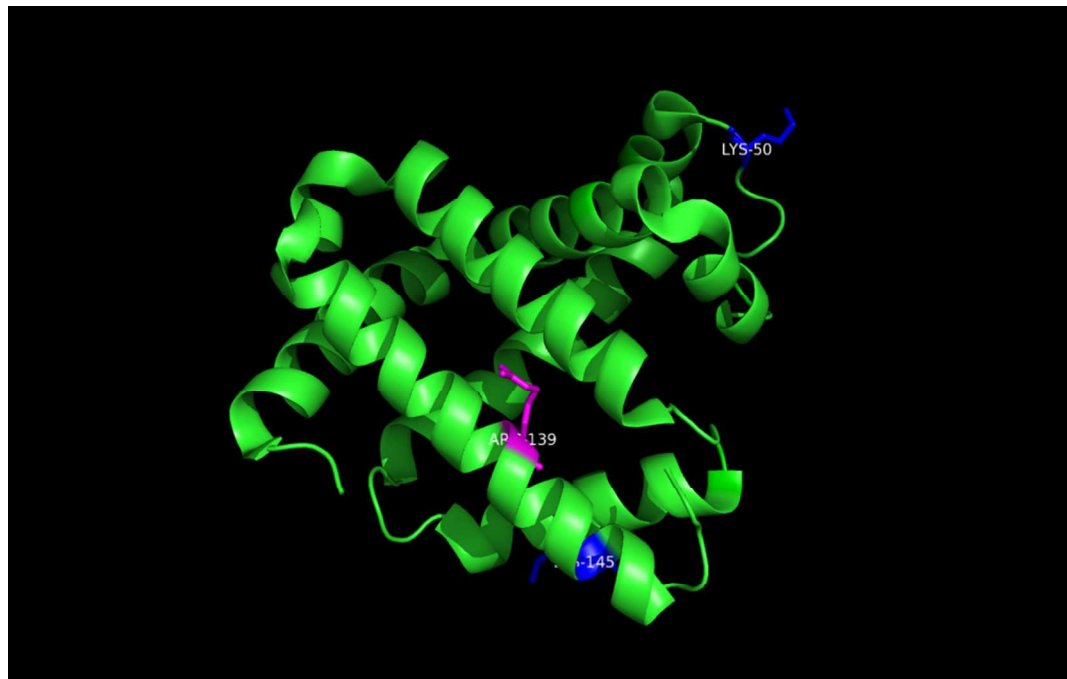

(B)

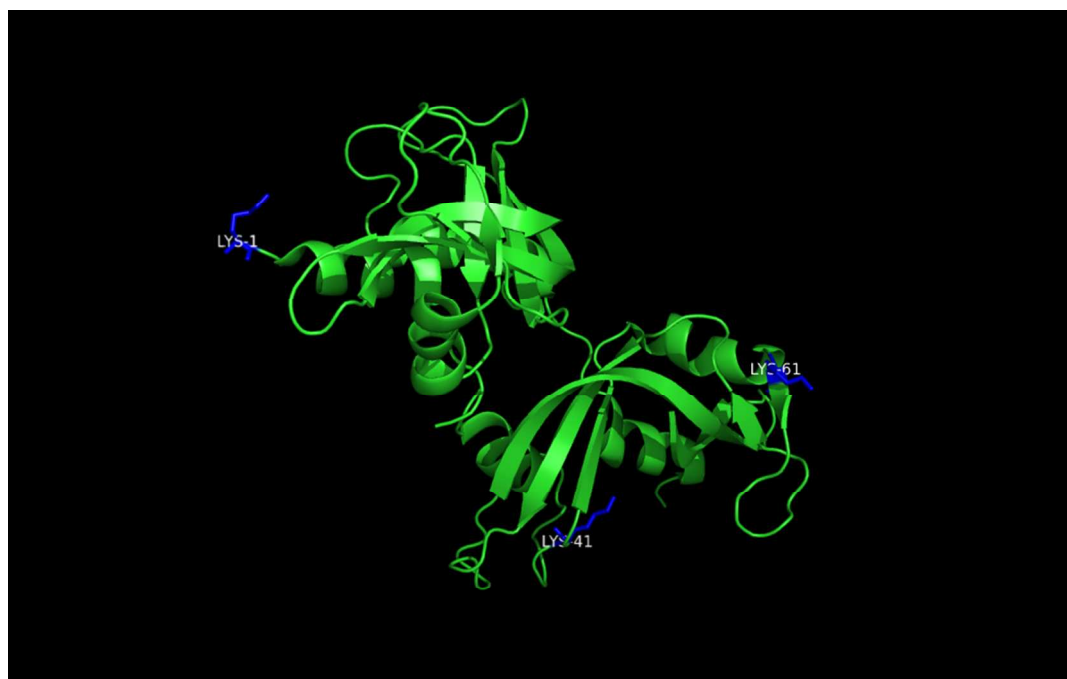



**Figure S5.** HPLC-ESI<sup>+</sup>-MS/MS analysis of 7-deaza-7-(2-(N-acetylarginine)ethan-1-yl)-2'-deoxyguanosine.

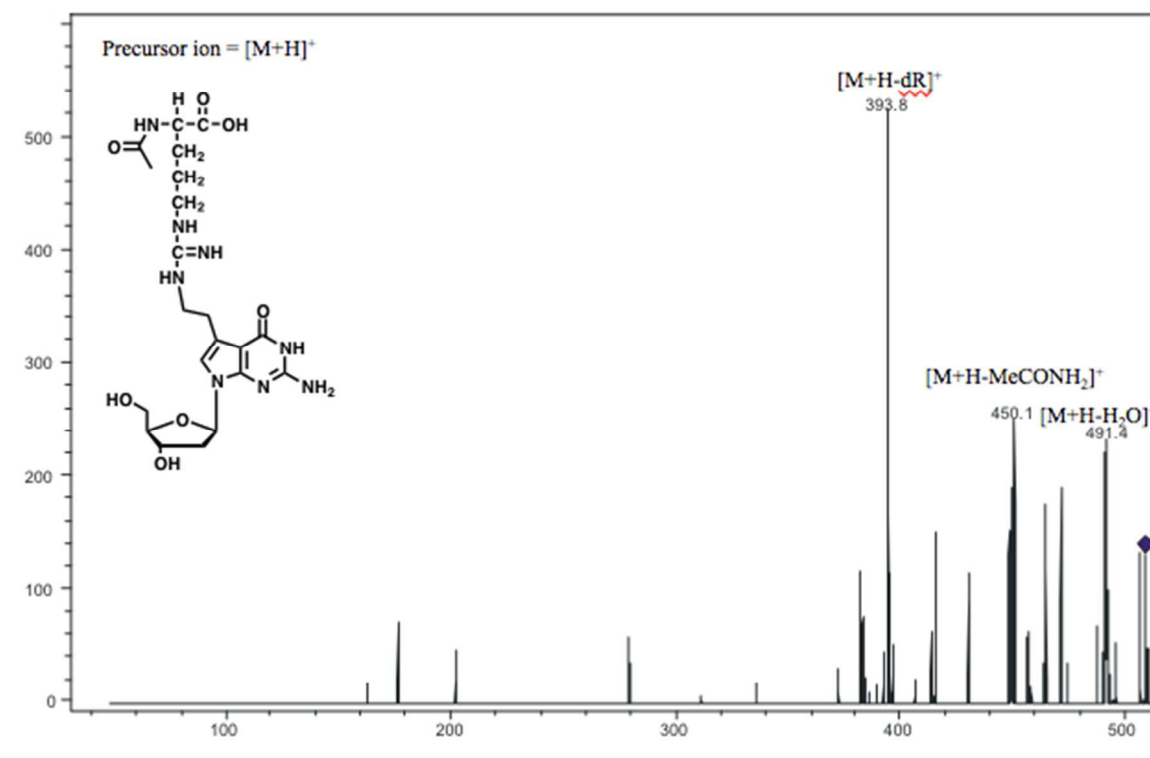

Supplement: NIHMS516507-supplement-1_si_001.pdf [file NIHMS516507-supplement-1_si_001.pdf]
